# Supplementary material for: Functional characterization of cucumber (Cucumis sativus L.) Clade V MLO genes
Source: PubMed Central journal article supplement (PMC5399834; doi:10.1186/s12870-017-1029-z), 2017-04-21

**A**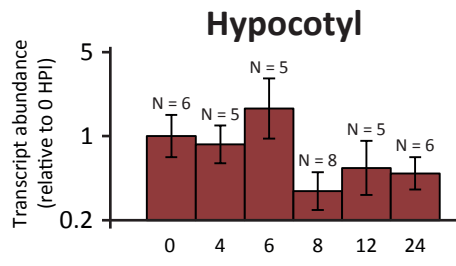**B**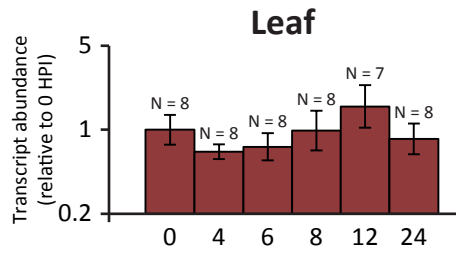

Supplement: 12870_2017_1029_MOESM3_ESM.pdf [file 12870_2017_1029_MOESM3_ESM.pdf]
