# Supplementary material for: Functional characterization of cucumber (Cucumis sativus L.) Clade V MLO genes
Source: PubMed Central journal article supplement (PMC5399834; doi:10.1186/s12870-017-1029-z), 2017-04-21
Supplement: 12870_2017_1029_MOESM6_ESM.pdf [file 12870_2017_1029_MOESM6_ESM.pdf]

AMLO2 MA-DQVKERT EETSTWAVA VVCFVLLAIS VVEHSHHK GTWEKKKHKQ ALFEALEKVK AELMLGFISS LLTIGOTPI SNICISQKIA STMHPCSAAE 99  
AMLO6 MA-DQVKERT EETSTWAVA VVCFVLLAIS VVEHSHHK GSGKKNKXK ALFEALEKVK AELMLGFISS LLTIGOTPI SNICIPKXIA ASMHPCSASE 97  
AMLO12 MA-LKERS EETPTWAVA VVCFVLLAIS MVEYFHE GHWFKKKHK ALSEALEKVK AELMLGFISS LLTIGOTPI SNICIPKXIA ATWHPCSNHO 97  
MMLO1 MAEDKYYERT EETPTWAVA VVCFVLLAIS VVEHSHHA GKWFKKKNK ALFEALEKVK GEMLMGFISS LLTIGOTPI SKICISQKIG STWHPCSTPK 100  
PsML01 MAEGGKERT EETPTWAVA VVCFVLLAIS VVEHSHHA GKWFKKKNK ALFEALEKVK GEMLMGFISS LLTIGOTPI SKICISQKIG STWHPCSTPN 100  
LjML01 M-DKLAQK EETPTWAVA VVCFVLLAIS VVEHSHHA KWFKKRHK ALFEALEKVK GEMLMGFISS LLTIGOTPI SNICISQKIA STWHPCHPE 98  
CsaML01 MA-GAAGKS EETPTWAVA VVCFVLLAIS VVEHSHHA GHWFKKKHK ALFEALEKVK SEMLMGFISS LLTIGOTPI TEICIPQXIA ATWHPCKTER 99  
CsaML011 MA-GGAGRS EETPTWAVA VVCFVLLAIS VVEHSHHA GKWFKKRHK ALFEALEKVK SEMLMGFISS LLTIGOS TNCIPQXIA ATWHPCSPR 99  
CsaML08 MAEGGTEQRT EETPTWAVA VVCFVLLAIS VVEHSHHA GKWFKKRHK ALFEALEKVK AELMLGFISS LLTIGOTPI TNCISQKIA ATWHPCAARA 100  
SIMLO1 M-----EATPTWAVA VVCFVLLAIS VVEHSHHA GEWLKRRKK SLYEALEKVK AELMLGFISS LLTIGOTPI SNICIPKXIG YSWHPCKMKE 90  
CaML02 MA-LKERS EATPTWAVA VVCFVLLAIS VVEHSHHA GEWLKRRKK SLYEALEKVK AELMLGFISS LLTIGOTPI SNICIPKXIG YSWHPCKMKE 96  
NMLO1 M-----EATPTWAVA VVCFVLLAIS VVEHSHHA GEWLKRRKK SLYEALEKVK AELMLGFISS LLTIGOTPI SNICIPKXIG YSWHPCKMKE 90  
Consensus MA-D-VKERT LEETPTWAVA VVCFVLLAIS VVEHSHHK GTWELKRRKK SLYEALEKVK AELMLGFISS LLTIGOTPI SNICIPKXIA ATWHPCSAXE

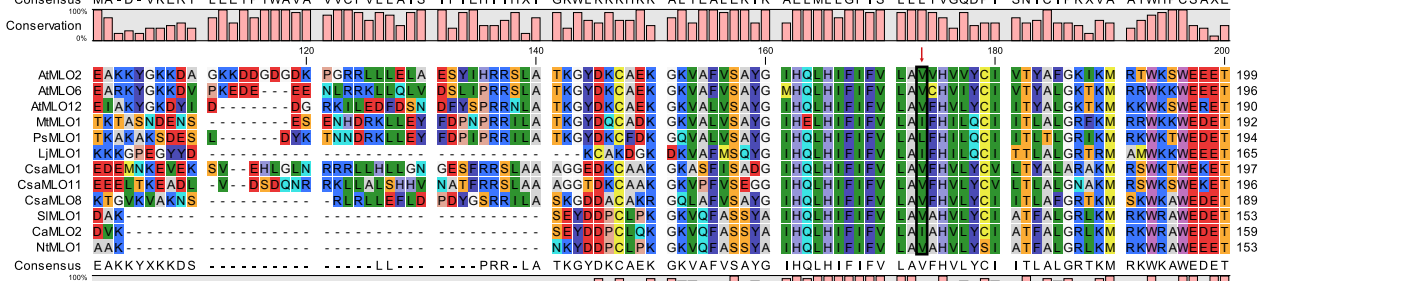

AMLO2 EAKKYGKKA GKDDGQDK PCRRLLLEIA ESYHRRSLA TKGYDCAEK GKVAFVSAYG IHQLHIFIV LAVFHVLYCI VTYAGLTKM RTWKSWEET 199  
AMLO6 EAKKYGKKA GKDEDEE NRRLLQLV DSLEPRSSIA AGGTDCAAK GKAFVVSAYG MHQLHIFIV LAACHVYCI VTYAGLTKM RRWKWEET 196  
AMLO12 EAKKYGKKA GKDEDEE NRRLLQLV DSLEPRSSIA AGGTDCAAK GKAFVVSAYG MHQLHIFIV LAACHVYCI VTYAGLTKM RRWKWEET 190  
MMLO1 TKTASNDKST -----ESNHDRKLEFY FDPNPRRLA TKGYDCAEK GKAFVVSAYG IHQLHIFIV LAACHVYCI VTYAGLTKM RRWKWEET 192  
PsML01 TKAAGKSDS -----DYK TNDRRLLEIA FDPNPRRLA TKGYDCAEK GKAFVVSAYG IHQLHIFIV LAACHVYCI VTYAGLTKM RRWKWEET 194  
LjML01 KKKGPEGYD -----KCAKDK GKAFVVSAYG MHQLHIFIV LAACHVYCI VTYAGLTKM RRWKWEET 165  
CsaML01 EDEMNEKESV SV-EHGNR RRRLLHLLGN GESFRRSLAA AGGTDCAAK GKAFVVSAYG IHQLHIFIV LAACHVYCI VTYAGLTKM RRWKWEET 197  
CsaML011 EDETKEABE V-DSGNR RKLALSHHV NATERRSLAA AGGTDCAAK GKAFVVSAYG MHQLHIFIV LAACHVYCI VTYAGLTKM RRWKWEET 196  
CsaML08 KTGKMAKNS -----RRLREED PDVGSRRLLA SKGDDCAAK GKAFVVSAYG IHQLHIFIV LAACHVYCI VTYAGLTKM RRWKWEET 189  
SIMLO1 EAK----- -----RRLREED PDVGSRRLLA SKGDDCAAK GKAFVVSAYG IHQLHIFIV LAACHVYCI VTYAGLTKM RRWKWEET 153  
CaML02 EAK----- -----RRLREED PDVGSRRLLA SKGDDCAAK GKAFVVSAYG IHQLHIFIV LAACHVYCI VTYAGLTKM RRWKWEET 159  
NMLO1 EAK----- -----RRLREED PDVGSRRLLA SKGDDCAAK GKAFVVSAYG IHQLHIFIV LAACHVYCI VTYAGLTKM RRWKWEET 153  
Consensus EAKKYXKKS -----LL-----PRR-LA TKGYDCAEK GKVAFVSAYG IHQLHIFIV LAVFHVLYCI ITLALGRKM RKWKAWEET

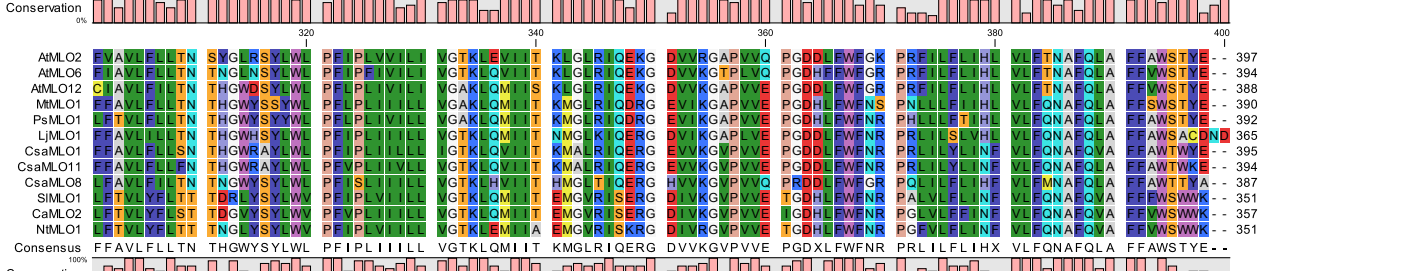

AMLO2 KTI EYQYND PERFRFARDT SFGRRHLSFW SKSPILLWIV CFRQFFGSV TKVDYDLTRH GFIMAHAPG SDAXFDQKY IXRSLEXDFK VVVGISPAIWI 299  
AMLO6 KTI EYQYND PERFRFARDT SFGRRHLSFW SKSTITLWIT CFRQFFGSV TKVDYDLTRH GFIMAHAPG SARFDQKY IRSLEEDK TVEIPAVPW 296  
AMLO12 KTI EYQYND PERFRFARDT SFGRRHLSFW SKSTITLWIT CFRQFFGSV TKVDYDLTRH GFIMAHAPG SARFDQKY IRSLEEDK TVEIPAVPW 290  
MMLO1 RTVEYQYND PERFRFARDT SFGRRHLSFW TKSPISLWIT CFRQFFGSV TKVDYDLTRH GFIMAHAPG NAEFDQKY IRSLEEDK TVEIPAVPW 292  
PsML01 KTI EYQYND PERFRFARDT SFGRRHLSFW AQSPILLWIV SFRQFFGSV SRVDYDLTRH GFIMAHAPG HAQFDQKY IRSLEEDK TVEIPAVPW 294  
LjML01 KTI EYQYND PERFRFARDT SFGRRHLSFW SQSPISLWIT SFRQFFGSV SRVDYDLTRH GFIMAHAPG SESKFDQKY IRSLEEDK TVEIPAVPW 265  
CsaML01 KTA EYQYND PERFRFARDT SFGRRHLSFW TKNPAIWI CFRQFFGSV PKVDYDLTRH GFIMAHAPG SHQFDQKY IRSLEEDK TVEIPAVPW 297  
CsaML011 KTA EYQYND PERFRFARDT SFGRRHLSFW TKNPAIWI CFRQFFGSV PKVDYDLTRH GFIMAHAPG SHQFDQKY IRSLEEDK TVEIPAVPW 296  
CsaML08 KTI EYQYND PARFRFARDT SFGRRHLSFW SRTPLSWIT CFRQFFGSV AKVDYDLTRH GFIMAHAPG SEWKFQKY IRSLEEDK TVEIPAVPW 289  
SIMLO1 KTI EYQYND PERFRFARDT SFGRRHLSFW SKSPISLWIT CFRQFFGSV AKVDYDLTRH GFIMAHAPG NONNDFQKY NRAVDKDK VVGISPAIWI 253  
CaML02 KTI EYQYND PERFRFARDT SFGRRHLSFW SKSPISLWIT CFRQFFGSV AKVDYDLTRH GFIMAHAPG NOENDFQKY NRAVDKDK VVGISPAIWI 259  
NMLO1 KTI EYQYND PERFRFARDT SFGRRHLSFW SKSPISLWIT CFRQFFGSV AKVDYDLTRH GFIMAHAPG NOENDFQKY NRAVDKDK VVGISPAIWI 253  
Consensus KTI EYQYND PERFRFARDT SFGRRHLSFW SKSPILLWIV CFRQFFGSV TKVDYDLTRH GFIMAHAPG SDAXFDQKY IXRSLEXDFK VVVGISPAIWI

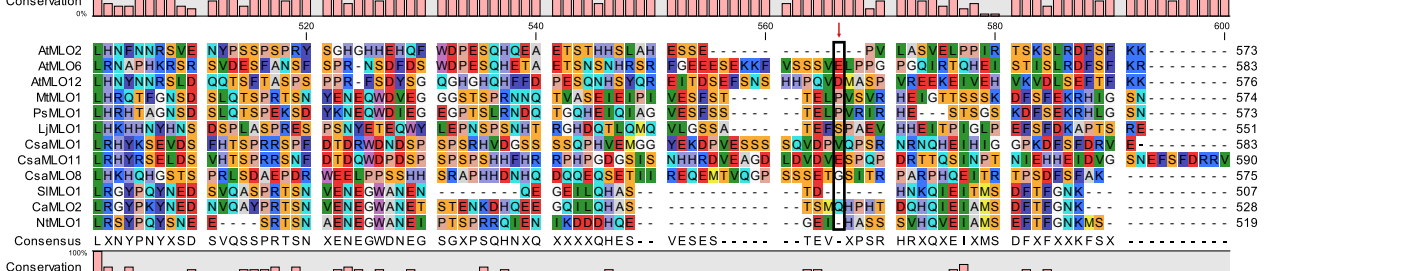

AMLO2 FVAVLFLLTN SYGLRSYLW PEIPLVILV VGTKLVIT KLGRIOERG DVVKGAPVVG PGDDLFWFR PRFLFLHL VLFQNAFOLA FFAWSTYE-- 397  
AMLO6 FVAVLFLLTN TNGNSYLW PEIPLVILV VGTKLVIT KLGRIOERG DVVKGAPVVG PGDDLFWFR PRFLFLHL VLFQNAFOLA FFAWSTYE-- 394  
AMLO12 FVAVLFLLTN THGWSSYLW PEIPLVILV VGTKLVIT KLGRIOERG DVVKGAPVVG PGDDLFWFR PRFLFLHL VLFQNAFOLA FFAWSTYE-- 388  
MMLO1 FVAVLFLLTN THGWSSYLW PEIPLVILV VGTKLVIT KLGRIOERG DVVKGAPVVG PGDDLFWFR PRFLFLHL VLFQNAFOLA FFAWSTYE-- 390  
PsML01 FVAVLFLLTN THGWSSYLW PEIPLVILV VGTKLVIT KLGRIOERG DVVKGAPVVG PGDDLFWFR PRFLFLHL VLFQNAFOLA FFAWSTYE-- 392  
LjML01 FVAVLFLLTN THGWSSYLW PEIPLVILV VGTKLVIT NMGKIOERG DVVKGAPVVG PGDDLFWFR PRFLFLHL VLFQNAFOLA FFAWSTYE-- 365  
CsaML01 FVAVLFLLTN THGWSSYLW PEIPLVILV VGTKLVIT KMLAIOERG DVVKGAPVVG PGDDLFWFR PRFLFLHL VLFQNAFOLA FFAWSTYE-- 395  
CsaML011 FVAVLFLLTN THGWSSYLW PEIPLVILV VGTKLVIT KMLAIOERG DVVKGAPVVG PGDDLFWFR PRFLFLHL VLFQNAFOLA FFAWSTYE-- 394  
CsaML08 FVAVLFLLTN THGWSSYLW PEIPLVILV VGTKLVIT HMGTIOERG DVVKGAPVVG PGDDLFWFR PRFLFLHL VLFQNAFOLA FFAWSTYE-- 387  
SIMLO1 FVAVLFLLTN THGWSSYLW PEIPLVILV VGTKLVIT EMGVSIOERG DVVKGAPVVG PGDDLFWFR PRFLFLHL VLFQNAFOLA FFAWSTYE-- 351  
CaML02 FVAVLFLLTN THGWSSYLW PEIPLVILV VGTKLVIT EMGVSIOERG DVVKGAPVVG PGDDLFWFR PRFLFLHL VLFQNAFOLA FFAWSTYE-- 357  
NMLO1 FVAVLFLLTN THGWSSYLW PEIPLVILV VGTKLVIT EMGVSIOERG DVVKGAPVVG PGDDLFWFR PRFLFLHL VLFQNAFOLA FFAWSTYE-- 351  
Consensus FVAVLFLLTN THGWSSYLW PEIPLVILV VGTKLVIT KMLAIOERG DVVKGAPVVG PGDXLFWFR PRLILFLHX VLFQNAFOLA FFAWSTYE--

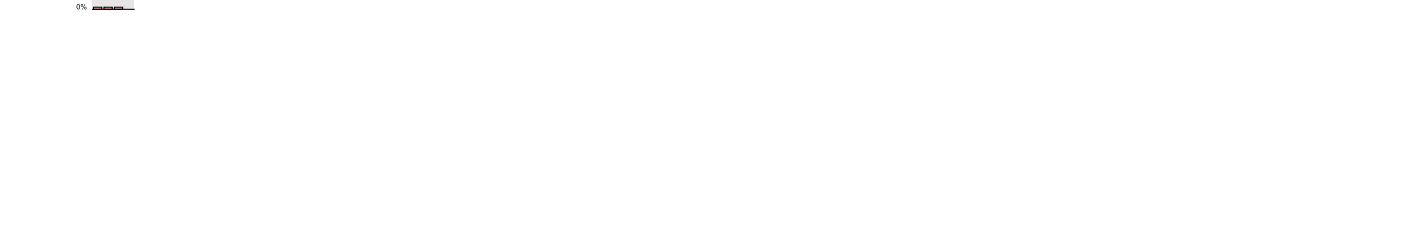

AMLO2 FGLNCFHEX TADVIRLTM GVLIQVLCYS VTLPLVALVT QMGSTMKPTI FNDRVATALK SWHHTAKKXV KHGRHSXS-- TTPFSSRPAT PTHGMSPVHL 495  
AMLO6 FGLNCFHEX RVDVIRLTM GVLIQVLCYS VTLPLVALVT QMGSTMKPTI FNDRVATALK SWHHTAKKXV KHGRHSXS-- TTPFSSRPAT PTHGMSPVHL 492  
AMLO12 FGLNCFHEX TADVIRLTM GVLIQVLCYS VTLPLVALVT QMGSTMKPTI FNDRVATALK SWHHTAKKXV KHGRHSXS-- TTPFSSRPAT PTHGMSPVHL 485  
MMLO1 FGLNCFHEX TADVIRLTM GVLIQVLCYS VTLPLVALVT QMGSTMKPTI FNDRVATALK SWHHTAKKXV KHGRHSXS-- TTPFSSRPAT PTHGMSPVHL 488  
PsML01 FGLNCFHEX TADVIRLTM GVLIQVLCYS VTLPLVALVT QMGSTMKPTI FNDRVATALK SWHHTAKKXV KHGRHSXS-- TTPFSSRPAT PTHGMSPVHL 490  
LjML01 FGLNCFHEX TADVIRLTM GVLIQVLCYS VTLPLVALVT QMGSTMKPTI FNDRVATALK SWHHTAKKXV KHGRHSXS-- TTPFSSRPAT PTHGMSPVHL 495  
CsaML01 FGLNCFHEX TADVIRLTM GVLIQVLCYS VTLPLVALVT QMGSTMKPTI FNDRVATALK SWHHTAKKXV KHGRHSXS-- TTPFSSRPAT PTHGMSPVHL 491  
CsaML011 FGLNCFHEX TADVIRLTM GVLIQVLCYS VTLPLVALVT QMGSTMKPTI FNDRVATALK SWHHTAKKXV KHGRHSXS-- TTPFSSRPAT PTHGMSPVHL 490  
CsaML08 FGLNCFHEX TADVIRLTM GVLIQVLCYS VTLPLVALVT QMGSTMKPTI FNDRVATALK SWHHTAKKXV KHGRHSXS-- TTPFSSRPAT PTHGMSPVHL 485  
SIMLO1 FGLNCFHEX TADVIRLTM GVLIQVLCYS VTLPLVALVT QMGSTMKPTI FNDRVATALK SWHHTAKKXV KHGRHSXS-- TTPFSSRPAT PTHGMSPVHL 448  
CaML02 FGLNCFHEX TADVIRLTM GVLIQVLCYS VTLPLVALVT QMGSTMKPTI FNDRVATALK SWHHTAKKXV KHGRHSXS-- TTPFSSRPAT PTHGMSPVHL 455  
NMLO1 FGLNCFHEX TADVIRLTM GVLIQVLCYS VTLPLVALVT QMGSTMKPTI FNDRVATALK SWHHTAKKXV KHGRHSXS-- TTPFSSRPAT PTHGMSPVHL 449  
Consensus FGLNCFHEX TADVIRLTM GVLIQVLCYS VTLPLVALVT QMGSTMKPTI FNDRVATALK SWHHTAKKXV KHGRHSXS-- TTPFSSRPAT PTHGMSPVHL



AMLO2 HNENRNSVE NYPSSSPRY SGHGHEHOF WDPESQOETA ESTHHSAH ESSE-----PVLASVEPPR TSKSLRDFSE KK----- 573  
AMLO6 HNENRNSVE SVDESANSE SPR-NSDFDS WDPESQOETA ESTHHSAH GESESEKKE -----PPG PGRTOHKE STLSLRDFSE KK----- 583  
AMLO12 HNENRNSVE QOTSFTASP PPR-NSDFDS WDPESQOETA ESTHHSAH GESESEKKE -----PPG PGRTOHKE STLSLRDFSE KK----- 576  
MMLO1 HROTKNSD SLOTPRSTN YENQWVEG GQSGHGFND PSONHSYOR LTPSESSNS HHPODMASP REEKEHEH KVDSEKFE KK----- 574  
PsML01 HRHTAGNSD SLOTPRSTN YENQWVEG GQSGHGFND PSONHSYOR LTPSESSNS HHPODMASP REEKEHEH KVDSEKFE KK----- 573  
LjML01 HKHHNNSD SPSAPRES PSNYETQWY LFPNSPNSHT RGHDTLQWQ YLGSSA-----TEFPAER HE--STSGS KDFSEKRLIG SN----- 551  
CsaML01 RHYKSEVDS EHTSPRRSPE DTDQWDPSP SPSPSHHNSR RHPHGGSTIS NHHRDVEAG LDVDESPQR DRTTQSNPT NLEHHELDIG SNESEFDRRY 590  
CsaML011 RHYKSEVDS EHTSPRRSPE DTDQWDPSP SPSPSHHNSR RHPHGGSTIS NHHRDVEAG LDVDESPQR DRTTQSNPT NLEHHELDIG SNESEFDRRY 590  
CsaML08 HKHQHGSTP RLSDAEPPR WEELEPPSSH SRAPHHDHR DQEQESETR REQEMTQGP SSESCTSLR PARPHOETR TPDSEFAK----- 575  
SIMLO1 RGVPOYNEE SVQASPRSTN YENQWVEG GEILQHAS-----CE GEILQHAS-----TD-----HNKOLETMS DFTGK----- 507  
CaML02 RGVPOYNEE SVQASPRSTN YENQWVEG GEILQHAS-----CE GEILQHAS-----TSMOHPHT DQHOELAMS DFTGK----- 528  
NMLO1 RGVPOYNEE SVQASPRSTN YENQWVEG GEILQHAS-----CE GEILQHAS-----TSMOHPHT DQHOELAMS DFTGK----- 519  
Consensus LXNYPNYXSD SVQSSPRTSN XENEGWDEG SGXPSQHNQ XXXXQHES-- VESES-----TEV-XPSR HRXQXEIXMS DXFXKXFSX



AMLO2 --- 573  
AMLO6 --- 583  
AMLO12 --- 576  
MMLO1 --- 574  
PsML01 --- 573  
LjML01 --- 551  
CsaML01 --- 583  
CsaML011 **DRV** 594  
CsaML08 --- 575  
SIMLO1 --- 507  
CaML02 --- 528  
NMLO1 --- 519  
Consensus ---  
Conservation
